# Supplementary material for: In situ coupling of TiO2(B) and ZIF-8 with enhanced photocatalytic activity via effective defect
Source: Royal Society of Chemistry journal article supplement (doi:10.1039/d0ce00595a), 2020-01-01
Supplement: d0ce00595a1.pdf [file d0ce00595a1.pdf]

## Supporting Information

### **In-situ coupling TiO<sub>2</sub>(B) and ZIF-8 with enhanced photocatalytic activity via effective deficient**

Xiaoxue Qi<sup>a</sup>, Feng Shang<sup>b</sup>, Tao Wang<sup>c</sup>, Yuqin Ma<sup>a\*</sup>, Yongsheng Yan<sup>c, d\*</sup>

<sup>a</sup>School of Chemistry and Environmental Engineering, Changchun University of Science and Technology, 130022 Changchun, P. R. China.

<sup>b</sup>Bureau of Ecology and Environment of Changchun Jiutai Branch Office, 130022 Changchun, P. R. China.

<sup>c</sup>School of Chemistry and Chemical Engineering, Jiangsu University, 212013 Zhenjiang, P. R. China.

<sup>d</sup>Institute of Green Chemistry and Chemical Technology, Jiangsu University, 212013 Zhenjiang, P. R. China.

\*Corresponding author: Tel: 15044087078

School of Chemistry and Environmental Engineering, Changchun University of Science and Technology, Changchun, Jilin Province, 86-130022, China

Email: myq3939@163.com

## Characterization

Analysis of crystalline structure and phase purity of samples by X-ray diffraction (XRD, MAC Science, MXP18, Japan). Field emission scanning electron microscopy (FE-SEM, XL30ESEM-FEG and Hitachi S-4800) and transition electron microscopy (TEM, JEOL JEM-2010HR) were used to characterize the morphology and structure of the prepared samples. The Nicolet 360 spectrometer characterized transform infrared (FT-IR) spectroscopy. Raman spectra was recorded using an HR 800 Raman spectrometer (JY, France). The light absorption capacity of prepared samples was investigated by UV-vis diffuse reflectance spectroscopy (UV-5800PC, Shanghai). The chemical bonds and composition of the surface on the samples were performed by X-ray photoelectron spectroscopy (XPS, Thermo Electron, ESCALAB 250 Xi A1440, USA). EPR spectra were registered at 300 K using a Bruker ER083CS spectrometer, at a microwave frequency of 9.85 GHz. Analysis of photocurrent using the 300 W Xe lamp (cutting off  $\lambda < 420\text{nm}$ ) and  $\text{Na}_2\text{SO}_4$  (0.5M) as the source and electrolyte. Test the impedance of the samples with  $\text{Na}_2\text{SO}_4$  (0.5M) as the electrolyte.

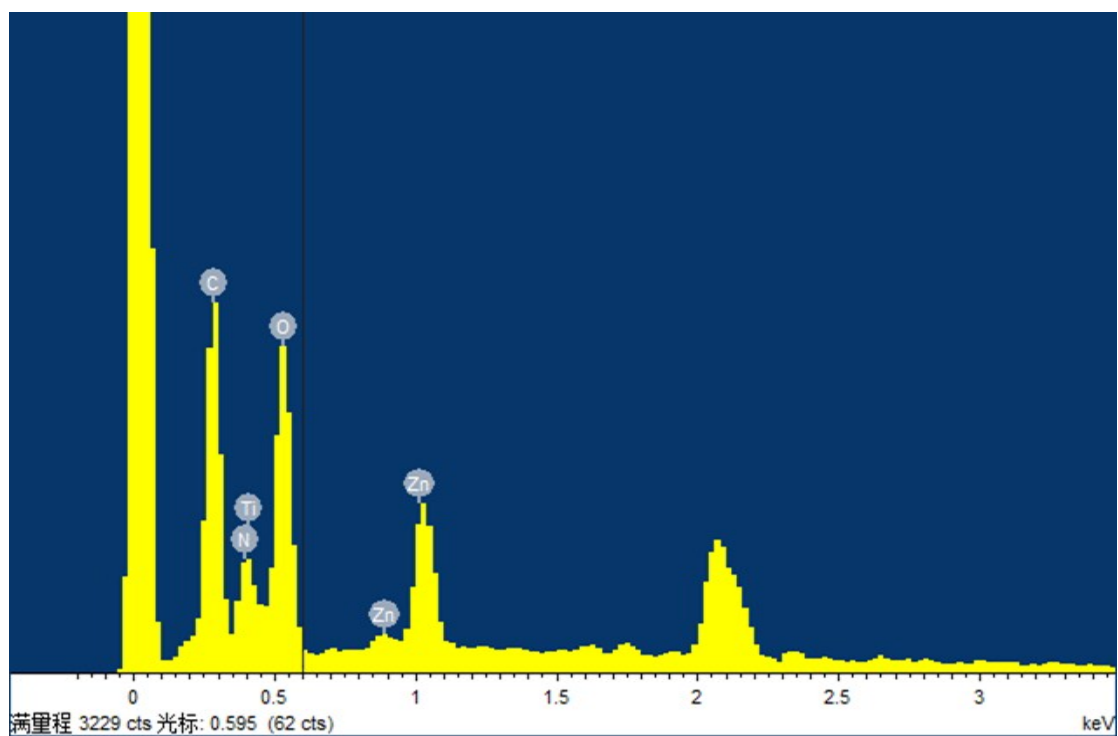

Figure S1. EDS image of b-TiO<sub>2</sub>/ZIF-8.

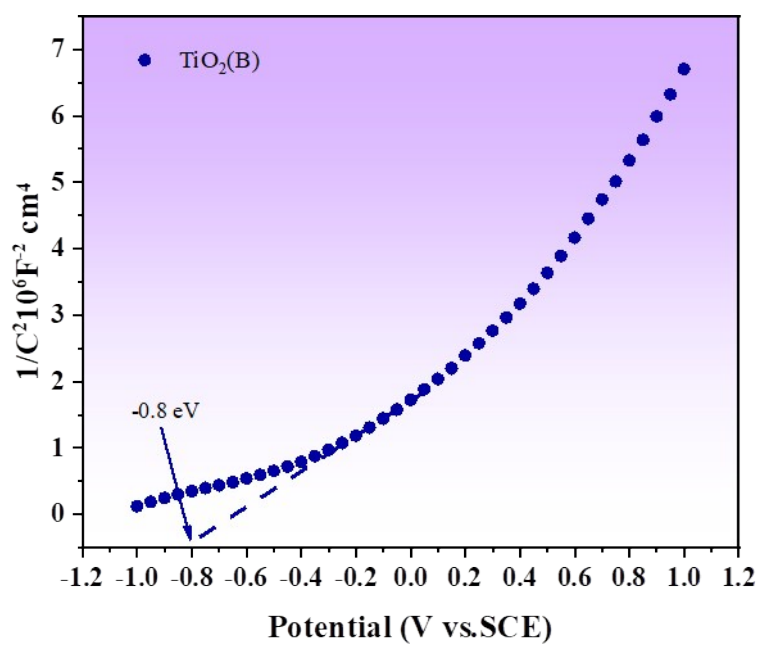

Figure S2. The Mott-Schottky plot of TiO<sub>2</sub>(B)
